## RESEARCH ARTICLE

# Knowledge, attitude, practice, and factors associated with prevention practice towards COVID-19 among healthcare providers in Amhara region, northern Ethiopia: A multicenter cross-sectional study

Wassachew Ashebir<sup>1\*</sup>, Belete Yimer<sup>2</sup>, Atsede Alle<sup>1</sup>, Muluken Teshome<sup>1</sup>, Yohannes Teka<sup>1</sup>, Awwaris Wolde<sup>1</sup>

**1** Department of Public Health, Debre Markos University, Debre Markos, Ethiopia, **2** Department of Human Nutrition, Debre Markos University, Debre Markos, Ethiopia

\* [ashebirwase@gmail.com](mailto:ashebirwase@gmail.com)

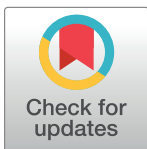

## OPEN ACCESS

**Citation:** Ashebir W, Yimer B, Alle A, Teshome M, Teka Y, Wolde A (2022) Knowledge, attitude, practice, and factors associated with prevention practice towards COVID-19 among healthcare providers in Amhara region, northern Ethiopia: A multicenter cross-sectional study. *PLOS Glob Public Health* 2(4): e0000171. <https://doi.org/10.1371/journal.pgph.0000171>

**Editor:** David Musoke, Makerere University School of Public Health, UGANDA

**Received:** October 21, 2021

**Accepted:** March 9, 2022

**Published:** April 11, 2022

**Copyright:** © 2022 Ashebir et al. This is an open access article distributed under the terms of the [Creative Commons Attribution License](https://creativecommons.org/licenses/by/4.0/), which permits unrestricted use, distribution, and reproduction in any medium, provided the original author and source are credited.

**Data Availability Statement:** All relevant data are within the manuscript and its [Supporting information](#) files.

**Funding:** The authors received no specific funding for this work.

**Competing interests:** The authors have declared that no competing interests exist.

## Abstract

Healthcare providers (HCPs) are at an increased risk of getting COVID-19 as a result of their front-line works. Health behaviors of HCPs can influence prevention and control actions implemented in response to the pandemic. Hence, this study aimed to assess the knowledge, attitude, and practice (KAP) and factors associated with prevention practice towards COVID-19 among healthcare providers in Amhara region, northern Ethiopia. A multicenter cross-sectional study was conducted among 422 HCPs in selected public health facilities of Amhara region, between 20<sup>th</sup> September and 20<sup>th</sup> October 2020. Data related to HCP's KAP and socio-demographic characteristics were collected using a pre-tested self-administered questionnaire. Bloom's cut-off  $\geq 80\%$ ,  $\geq 90\%$ , and  $\geq 75\%$  was used to determine adequate knowledge, positive attitude, and good prevention practice, respectively. Data were analyzed using SPSS version 25.0. A multivariable logistic regression analysis was performed to identify factors significantly associated with COVID-19 prevention practice. Statistical significance was determined at a p-value of  $< 0.05$  and the presence of association was described using odds ratio (OR) with their 95% confidence interval (CI). Overall, 368 (89.8%), 387 (94.4%), and 326 (79.5%) HCPs had adequate knowledge, positive attitude, and good prevention practice towards COVID-19, respectively. Factors significantly associated with good COVID-19 prevention practice were being a Nurse in profession (AOR = 2.13, 95% CI = 1.13–3.99), having  $< 5$  years of working experience (AOR = 0.46, 95% CI = 0.24–0.86), using social media (AOR = 6.20, 95% CI = 2.33–16.51) and television and or radio (AOR = 4.03, 95% CI = 1.56–10.38) as sources of COVID-19 information. HCPs had adequate knowledge, positive attitude and good prevention practice towards COVID-19. Being a Nurse, having  $< 5$  years of working experiences, using social media and television and or radio were factors associated with good prevention practice. Thus, developing HCP's professional carrier through training opportunities, sharing experiences and using verified information sources are crucial to better improve COVID-19 prevention practice.

## Introduction

Coronavirus disease 2019 (COVID-19) is caused by a novel human coronavirus called severe acute respiratory syndrome coronavirus 2 (SARS-CoV-2) [1,2]. The first case of COVID-19 was identified in Wuhan, Hubei province, China by the end of the year 2019 [2,3]. Within a month of its appearance, the disease has spread dramatically around the world. Because of this nature, it was declared as a public health emergency that deserves international attention. Following its declaration as a global pandemic by the World Health Organization (WHO) again, all countries are called for collaborative efforts to combat the threat caused by this virus [4,5]. Worldwide, the severe disturbance of COVID-19 has been well noticed in terms of the daily confirmed cases and attack rates, associated mortalities and disrupted social and community lives [6,7]. Even though the largest spread of COVID-19 has been occurred in Europe and America, African countries were amongst the latest to be affected by the disease [7–10]. The huge comorbidities, low socio-economic condition, poor quality of care and the limited access to healthcare facilities would make the scene to be significant in the African situation [7,8].

Healthcare providers (HCPs) are at an increased risk of getting COVID-19 as a result of their front-line works [11]. Based on the experience from the 2003 SARS outbreak, one-fifth of the global burden of SARS cases occurred among healthcare workers (HCWs) [12]. Similarly, many HCPs have been infected with COVID-19 and others lost their lives in the current pandemic. As of 27 July 2020, the WHO estimated that more than 10% of the total COVID-19 cases worldwide occurred among HCPs with marked variations in countries across the world [10,13]. When compared with others, the sources of infection to COVID-19 in HCPs are plural i.e. from the community and working places. The HCPs are also predominant transmitters of infection to families, patients and the community [11–13]. The transmission of COVID-19 among HCPs is associated with overcrowding, lack of isolation room facilities, and unhygienic environmental conditions. However, this is likely coupled with the fact that some HCWs have inadequate knowledge of infection prevention practices [14].

Indeed, protection of HCPs and their working environment are relevant aspects in pandemic responses. This requires that HCPs must have up-to-date knowledge and optimistic attitude towards the many aspects of the pandemic. As well, preventive health behaviors of the HCPs have a direct COVID-19 effect on their and community health. These health behaviors are acquired, maintained, or changed with the help of the motivation and skills of HCPs [15,16]. In addition, increasing the awareness and preventive behavior of HCPs with continuous updates about COVID-19 is relevant [17,18]. Health behaviors of HCPs can influence prevention and control actions implemented in response to the pandemic [15]. Since HCPs are vital in the fight against COVID-19 pandemic, their prevention behavior takes a lion share of containing the infection among themselves and reducing the spread to others. This notably depends on their knowledge, attitude and practice in dealing with this highly transmissible virus [19]. As part of the pandemic response therefore, exploring HCP's knowledge, attitude and prevention practice is very important. These helps to notice deficiencies in COVID-19 understanding, related perceptions and prevention practices and thereby justify the significance to train frontline vulnerable HCPs on IPC skills [19,20].

Studies in various settings have indicated that there are huge differences in terms of the knowledge, attitude, and practice (KAP) of HCWs in the fight against the pandemic. Different factors like socio-demographic, knowledge and attitude were also identified to be associated with COVID-19 prevention practice [8,21–24]. Despite the fact that HCPs play a central role in the response to COVID-19, to our knowledge there is very limited information on the KAP of HCPs towards COVID-19. Also, few studies assessed HCPs prevention health behaviors during COVID-19 [25–27]. Particularly, data on the Ethiopian situation regarding the subject

matter are lacking. However, such data are important in designing evidence-based pandemic prevention and control interventions for this vulnerable group. Identifying the factors influencing prevention practice in a given health system is also a critical step to reduce infection prevention barriers. Therefore, the purpose of this study was to assess the knowledge, attitude, and practice and associated factors of prevention practice towards COVID-19 among health-care providers in Amhara region, northern Ethiopia.

## Materials and methods

### Study design, setting and population

A multi-center cross-sectional study was conducted from September to October 2020 among HCPs working in selected public health facilities in Southwest Amhara region, Ethiopia. Amhara region is the second-largest region in the country and its capital city is Bahir Dar city. The region has a total of twelve administration Zones. Located in the Southwest of Amhara region, East Gojjam Zone has 22 districts and three Town administrations. Our study was undertaken in four public hospitals and thirteen health centers in Southwest of Amhara region. All HCPs aged 18 years and above in the selected public health facilities were included in the study. The name of selected public health facilities and their location is given in the table below (Table 1).

### Sample size and sampling procedure

A sample size for this study was calculated using a single population proportion formula with the assumption of 50% of HCPs had COVID-19 prevention practice since no previous study on COVID-19 related KAP, with a 5% margin of error at a 95% confidence level, i.e.  $N = (1.96)^2 * 0.5 * 0.5 / (0.05)^2 = 384$  and after adding a 10% non-response rate, the final sample size was 422. From all districts found in Southwest of Amhara region, five districts namely Debre Markos, Machakel, Enemay, Enebse-sarmidir and Bibugn were selected using simple random sampling method. The estimated number of HCPs working in each district was obtained from

**Table 1. Name and location of selected public health facilities in Amhara region, Ethiopia, 2020.**

| Ser. No | Name and Type of HF                                     | Town/city      | District        |
|---------|---------------------------------------------------------|----------------|-----------------|
| 1       | Debre Markos Comprehensive Specialized Hospital (DMCSH) | Debre Markos   | Debre Markos    |
| 2       | Bichena Primary Hospital (BPH)                          | Bichena        | Enemay          |
| 3       | Bibugn Primary hospital (BPH)                           | Guha-Tsion     | Bibugn          |
| 4       | Merto-Lemariam Primary Hospital (MLPH)                  | Merto-Lemariam | Enebse-Sarmidir |
| 5       | Amanuel health center                                   | Amanuel        | Machakel        |
| 6       | Degasign health center                                  | Amanuel        | Machakel        |
| 7       | Kidamin health center                                   | Amanuel        | Machakel        |
| 8       | Debrekelem health center                                | Amanuel        | Machakel        |
| 9       | Merto-Lemariam health center                            | Merto-Lemariam | Enebse-Sarmidir |
| 10      | Maraki health center                                    | Merto-Lemariam | Enebse-Sarmidir |
| 11      | Guha-Tsion health center                                | Guha-Tsion     | Bibugn          |
| 12      | Bibugn health center                                    | Guha-Tsion     | Bibugn          |
| 13      | Debre Markos health center                              | DM town        | Debre Markos    |
| 14      | Hidase health center                                    | DM town        | Debre Markos    |
| 15      | Wuseta health center                                    | DM town        | Debre Markos    |
| 16      | Bichena health center                                   | Bichena city   | Enemay          |
| 17      | Enemay health center                                    | Bichena city   | Enemay          |

<https://doi.org/10.1371/journal.pgph.0000171.t001>

the Regional Health Bureau. Based on the obtained information, the sample size for each district was proportionally allocated. The public health facilities found in the selected districts were first stratified as hospital and health centers. Then, the hospitals found in the four selected districts were obtained purposefully while the health centers in all selected districts were selected using lottery method. Finally, the study subjects were proportionally allocated for each selected health facilities. The HCPs in the selected health facilities were selected through simple random sampling procedure using the registered list of all HCPs provided from the human resource office of each selected public health facilities.

### Data collection tool and procedure

Data related to HCP's KAP and socio-demographic characteristics were collected using a structured and pre-tested self-administered questionnaire. The questionnaire was adapted and modified from previously published studies [28,29] and guidelines suggested by WHO related to COVID-19 IPC measures [19]. The questionnaire was initially prepared in English (S1 English version of the questionnaire) then translated to the local Amharic language (S2 Amharic version of the questionnaire) and translated back to English language to ensure its consistency and accuracy. Even though HCPs might read a questionnaire which is prepared in English language, it was hard to conclude that all of them would understand and interpret it in the same way. With the aim of conveying similar message and obtaining an anonymous response from all participants, the questionnaire used in this study was translated in to local Amharic language. The questionnaire was pre-tested on 5% of the study participants before the actual data collection period in health facilities which were not selected for the main study. Based on findings from the pretest, the clarity, appropriateness and redundancy of questions were revised and corrected accordingly. The questionnaire was divided into four sections. The first section assessed the socio-demographic characteristics of HCPs. The second section assessed the respondents' COVID-19 related knowledge. The third section assessed the respondents' COVID-19 related attitude and the fourth section assessed the respondents' COVID-19 prevention practice.

### Study variables and measurement

The main outcome variable in the study was COVID-19 prevention practice while socio-demographic and COVID-19 related characteristics were the independent variables for this study.

### Socio-demographic measures

Socio-demographic information was collected and included age, sex, profession, facility type, years of working experience and sources of COVID-19 related information. Age of HCPs was divided in two categories: 1) <30 years and 2)  $\geq$ 30 years. The cut-off for age was based on previous studies used to define HCPs as younger and older age groups [30,31]. *Working experience*, the number of years served as a health professional, was divided in two categories: 1) <5 years and 2)  $\geq$ 5 years. The cut-off for working experience was based on prior studies conducted in Pakistan and Saudi Arabia [32,33]. Membership in COVID-19 taskforce in this study described whether HCPs were active members of a committee established to run COVID-19 prevention and related activities or not, and was categorized as 'Yes' and 'No'.

## Knowledge, attitude and practice

KAP related to COVID-19 were assessed using a total of 26 items/questions (13 knowledge, 7 attitude and 6 practice) which were adapted from the work of Taghrir et al. and Roy et al. [34,35]. The different number of items and value scoring systems used to categorize KAP were then modified from the work of Olum et al., Bloom et al. and Goni et al. [8,36,37]. Accordingly, a cut-off  $\geq 80\%$  ( $\geq 10$  points out of 13),  $\geq 90\%$  ( $\geq 12$  points out of 14), and  $\geq 75\%$  ( $\geq 5$  points out of 6) was used to determine adequate knowledge, positive attitude, and good prevention practice, respectively.

Knowledge about COVID-19 was based on a 13-item scale that assessed HCP's understanding about the causative agent, mode of transmission, high risk groups, clinical manifestation as well as prevention and treatment of COVID-19. Each knowledge question had a possible response of "True", "False" and "Don't know". Then, the correct answer (True) was coded as 1, while the wrong answer (False / don't know) was scored as 0 during analysis. Accordingly, the total score ranged from 0–13, with an overall greater score indicated adequate knowledge. Based on the modified Bloom's cut-off point, a healthcare provider who scored  $\geq 80\%$  of the correct knowledge questions ( $\geq 10$  points out of 13) was considered as having "adequate knowledge" and who scored  $< 80\%$  ( $< 10$  points out of 13) was considered as having "inadequate knowledge." The reason for using an 80% cut off value for knowledge was by considering that majority of HCPs would attend training courses with respect to COVID-19 and they were also more likely to receive COVID-19 related information from a variety of information sources [36,37].

Attitude toward COVID-19 was based on a 7-item scale that assessed HCP's attitude towards treatment, infection control procedure and related information about COVID-19. The response of each statement was indicated on a 3-point Likert scale as follows: 2("Agree"), 1("Undecided") and 0("Disagree"). Accordingly, the total score ranged from 0–14, with an overall greater score indicated positive attitude. Based on the modified Bloom's cut-off point, a healthcare provider who scored  $\geq 90\%$  of the favorable attitude statements ( $\geq 12$  points out of 14) was considered as having "positive attitude" and who scored  $< 90\%$  ( $< 12$  points out of 14) was considered as having "negative attitude." The reason for using a 90% cut off value for attitude was by considering the uncontrolled nature of the pandemic and HCP's concerns of becoming infected, particularly given the shortage of personal protective equipment (PPE) [8,36,37].

COVID-19 related practice was based on a 6-item scale that assessed HCP's use of PPE and other counter measures. Each practice-related question was responded as "Yes regularly", "Not at all" and "occasionally". Accordingly, the total score ranged from 0–6, with an overall greater score indicated good prevention practice. Based on the modified Bloom's cut-off point, a healthcare provider who scored  $\geq 75\%$  of the correct practice questions ( $\geq 5$  points out of 6) was considered as having "good prevention practice" and who scored  $< 75\%$  ( $< 5$  points out of 6) was considered as having "poor prevention practice." The reason for using a 75% cut off value for practice was by considering the seriousness of the COVID-19, and the study participants are healthcare providers to whom the prevention practice is mandatory to keep themselves and their families safe from COVID-19 and be a role model to their patients and the rest of the community [8,36].

## Data processing and analysis

Data were checked, coded, and entered into Epi Info version 7.0 and exported to SPSS version 25.0 for analysis. Descriptive statistics such as frequency, percentages, mean, and standard deviation were computed to summarize categorical and numerical data. Bloom's modified cut-

off point was used to determine adequate knowledge ( $\geq 80\%$ ), positive attitude ( $\geq 90\%$ ) and good prevention practice ( $\geq 75\%$ ) (36). Bivariable logistic regression analysis was initially done to identify the candidate independent variables which had association with COVID-19 prevention practice. Then, all independent variables having a p-value of  $< 0.2$  in the bivariable analysis were transferred to the multivariable analysis to identify significantly associated factors of prevention practice. Model fitness for the final model was checked using Hosmer and Lemeshow goodness of fit. Statistical significance was determined at a p-value of  $< 0.05$  and the presence of association was described by using odds ratio (OR) with their 95% confidence interval (CI).

### Ethics statement

Ethical clearance and approval was obtained from the Ethical Review committee of College of Health Science, Debre Markos University. A formal letter of cooperation was obtained from each district administration and health facility. After the aim of the study was clearly explained, both written and verbal consent were obtained from all study participants. The consent form documented the aims, nature, and procedure of the study. The privacy and confidentiality of information was also strictly guaranteed by all data collectors and investigators.

## Results

### Socio-demographic and COVID-19 related characteristics of study participants

Of the total 422 HCPs approached, 410 HCPs responded to the self-administered interview, giving a response rate of 97%. The mean age of the participants was 28.9 years ( $SD \pm 5.88$ ) and the age range was from 20–52 years old. Nearly two-thirds of the participants were male and aged below 30 years. Most of the study participants were Nurses (42.9%), worked in hospitals (61%) and served for  $< 5$  years (58.2%). Television and/or radio (42%) and social media (35.1%) were identified by participants as the major sources of information about COVID-19. In addition, 386 (94.1%) participants heard about COVID-19. Over half (54.6%) of the HCPs attended formal training on COVID-19 and 182 (44.4%) of them were members of the COVID-19 taskforce (Table 2).

### Knowledge of HCPs about COVID-19

The finding showed that nearly nine in ten HCPs (89.8%) had adequate knowledge about COVID-19. More than 90% of the participants were aware of the causative agent, high risk population groups, severity and fatality of COVID-19, and the care needed for COVID-19 symptomless individuals. Most of the participants (87.3%) identified fever, dry cough, and shortness of breath as the major symptoms of the COVID-19 infection. The majority of HCPs (85.9%) mentioned washing hands with soap and water and wearing a face mask as vital ways to prevent COVID-19. Over three-fourths of the participants (79.5%) mentioned as COVID-19 can be transmitted by droplets and close contact. Slightly below two-thirds of the HCPs reported the correct incubation period (2–14 days), and only 14.9% HCPs reported the current presence of a vaccine for COVID-19 (Table 3).

### Attitudes of HCPs towards COVID-19

As indicated by the findings from this study, the majority of respondents (94.4%) had a positive attitude toward COVID-19. The vast majority of respondents strongly agreed on mandatory quarantine (93.2%), the use of gowns and gloves while giving care (87.8%), dissemination

**Table 2. Socio-demographic characteristics of participants among health care providers in Amhara region, Ethiopia, 2020.**

| Characteristic                           |                             | Number (%) |
|------------------------------------------|-----------------------------|------------|
| Age group (years)                        | <30                         | 264 (64.4) |
|                                          | ≥30                         | 146 (35.6) |
| Sex                                      | Female                      | 140 (34.1) |
|                                          | Male                        | 270 (65.9) |
| Profession                               | Physician                   | 50 (12.2)  |
|                                          | Nurse                       | 176 (42.9) |
|                                          | Health officer              | 52 (12.7)  |
|                                          | Pharmacist                  | 64 (15.6)  |
|                                          | Others*                     | 68 (16.6)  |
| Health care providers' health facilities | Health center               | 160 (39.0) |
|                                          | Hospital                    | 250 (61.0) |
| Working experience (years)               | <5                          | 239 (58.3) |
|                                          | ≥5                          | 171 (41.7) |
| Source of information about COVID-19     | Social media e.g., Facebook | 144 (35.1) |
|                                          | Television and/ or radio    | 172 (42.0) |
|                                          | Others**                    | 94 (22.9)  |

Others\* -Midwife, Laboratory staff, Anesthetist and Radiologist.

Others\*\* -Workshop and seminar, Poster and leaflet, Colleagues and official government website.

<https://doi.org/10.1371/journal.pgph.0000171.t002>

of COVID-19 related scientific information (82.4%), and active involvement of HCPs in infection control programs (81.5%). Most (74.1%) HCPs strongly believed that particular and sufficient care must be given for a patient with COVID-19. Only 29% of HCPs strongly believed that COVID-19 transmission can be prevented through practicing widely recommended official measures (Table 4).

### COVID-19 prevention practice of HCPs

Based on the findings of this study, nearly four-fifths (79.5%) of the HCPs had good prevention practices towards COVID-19. About 82.9% of the participants regularly covered their mouth and nose while sneezing and 82.4% of them wore face masks in crowded situations. Similarly, three-fourths (75.9%) of the HCPs reported to use a hand sanitizer regularly and about 71% of them regularly gave health education about COVID-19 for their patients/ clients (Table 5).

### Factors associated with COVID-19 prevention practice

From the multivariable logistic regression analysis being a Nurse in profession, having < 5 years of working experience, using social media and radio and/or television as sources of COVID-19 information had a significant association with HCP's COVID-19 prevention practice. HCPs who were Nurses in their profession were two times (AOR = 2.13, 95% CI = 1.13–3.99) more likely to have good COVID-19 prevention practice than Physicians. HCPs who had < 5 years of working experience were 46% times more likely to have good COVID-19 prevention practice than those who had ≥ 5 years of working experience (AOR = 0.46; 95% CI = 0.24, 0.86). The odds of having good COVID-19 prevention practice was six and four times higher among HCPs who used social media and radio and/or television (AOR = 6.20; 95% CI = 2.33, 16.51; AOR = 4.03; 95% CI = 1.56, 10.38), respectively when compared with those who used other sources of COVID-19 information (Table 6).

**Table 3. COVID-19 related knowledge of participants among health care providers in Amhara region, Ethiopia, 2020.**

| Knowledge about COVID-19                                               |       | Number (%) |
|------------------------------------------------------------------------|-------|------------|
| The causative agent of COVID-19 is a virus                             | False | 10 (2.4)   |
|                                                                        | True  | 400 (97.6) |
| COVID-19 can be severe and leads to death if not tread early           | False | 30 (7.3)   |
|                                                                        | True  | 380 (92.7) |
| The incubation period of COVID-19 virus is 2–14 days                   | False | 154(37.6)  |
|                                                                        | True  | 256 (62.4) |
| COVID-19 can be transmitted by droplets and close contact              | False | 84 (20.5)  |
|                                                                        | True  | 326 (79.5) |
| Antibiotics are the first-line treatment for COVID-19                  | False | 378 (92.2) |
|                                                                        | True  | 32 (7.8)   |
| Fever, cough and shortness of breath are major symptoms of COVID-19    | False | 52 (12.7)  |
|                                                                        | True  | 358 (87.3) |
| Currently there is a vaccine for COVID-19                              | False | 349 (85.1) |
|                                                                        | True  | 61 (14.9)  |
| Polymerase chain reaction (PCR) is vital for the diagnosis of COVID-19 | False | 140 (34.1) |
|                                                                        | True  | 270 (65.9) |
| Chronically ill and elderly people are at highest risk of COVID-19     | False | 24 (5.9)   |
|                                                                        | True  | 386 (94.1) |
| COVID-19 patients can develop severe acute respiratory illness         | False | 2 (.5)     |
|                                                                        | True  | 408 (99.5) |
| Influenza vaccine also gives protection from COVID-19                  | False | 356 (86.8) |
|                                                                        | True  | 54 (13.2)  |
| COVID-19 symptomless individuals also needs care                       | False | 40 (9.8)   |
|                                                                        | True  | 370 (90.2) |
| Hand washing and wearing face masks are vital to prevent COVID-19      | False | 58 (14.1)  |
|                                                                        | True  | 352 (85.9) |

<https://doi.org/10.1371/journal.pgph.0000171.t003>

**Table 4. COVID-19 related attitude of participants among health care providers in Amhara region, Ethiopia, 2020.**

| Attitude toward COVID-19                                                |                | Number (%) |
|-------------------------------------------------------------------------|----------------|------------|
| COVID-19 confirmed patients need to be kept in mandatory quarantine     | Strongly agree | 382(93.2)  |
|                                                                         | Agree          | 28(6.8)    |
| It is good to use gowns, gloves and mask while giving care for patients | Strongly agree | 360 (87.8) |
|                                                                         | Agree          | 50(12.2)   |
| HCPs have to disseminate COVID-19 related scientific information        | Strongly agree | 338(82.4)  |
|                                                                         | Agree          | 72(17.6)   |
| HCPs shall take the initiative in COVID-19 infection control program    | Strongly agree | 334(81.5)  |
|                                                                         | Agree          | 76(18.5)   |
| A patients with COVID-19 needs particular and sufficient care           | Strongly agree | 304(74.1)  |
|                                                                         | Agree          | 106(25.9)  |
| It is possible to prevent COVID-19 via practicing official measures     | Strongly agree | 119(29.0)  |
|                                                                         | Agree          | 291(71.0)  |

<https://doi.org/10.1371/journal.pgph.0000171.t004>

**Table 5. COVID-19 prevention practices of participants among health care providers in Amhara region, Ethiopia, 2020.**

| COVID-19 prevention practices                                 |               | Number (%) |
|---------------------------------------------------------------|---------------|------------|
| Do you use hand sanitizer before and after handling patients? | Occasionally  | 99 (24.1)  |
|                                                               | Yes regularly | 311 (75.9) |
| Do you use tissue to cover while sneezing or coughing?        | Occasionally  | 70 (17.1)  |
|                                                               | Yes regularly | 340 (82.9) |
| Do you wash hands frequently using water and soap?            | Occasionally  | 91 (22.2)  |
|                                                               | Yes regularly | 319 (77.8) |
| Do you avoid touching your mouth/nose/eye?                    | Occasionally  | 72 (17.6)  |
|                                                               | Yes regularly | 338 (82.4) |
| Do you use face mask in crowded situations?                   | Occasionally  | 72 (17.6)  |
|                                                               | Yes regularly | 338 (82.4) |
| Do you educate patients/clients about COVID-19?               | Occasionally  | 119 (29.0) |
|                                                               | Yes regularly | 291 (71.0) |

<https://doi.org/10.1371/journal.pgph.0000171.t005>

## Discussion

This study assessed KAP among HCPs and identified factors associated with COVID-19 prevention practice in Southwest Amhara region, Ethiopia. Accordingly, the proportion of adequate knowledge, positive attitude and good prevention practice towards COVID-19 among HCPs was 89.8%, 94.4%, and 79.5%, respectively. Furthermore, this study found that being a Nurse in profession, having < 5 years of working experience, using social media and radio and/or television as sources of COVID-19 information had a significant association with HCP's COVID-19 prevention practice.

In the current study, nearly nine in ten (89.8%) HCPs had adequate knowledge about COVID-19. This finding was almost comparable with prior studies conducted in Greece, Pakistan, and China where 88.28%, 89% and 93.2% of HCPs had sufficient knowledge of COVID-19 respectively [21,32,38]. Our finding was higher than the studies conducted elsewhere in Ethiopia. For example, 70% of HCPs in Addis Ababa and 74% in northern Ethiopia had good knowledge of COVID-19 as compared to the current finding [26,27]. This difference might be due to variation in the nature of the study. The former studies were about knowledge of HCPs on the overall infection prevention practice while our study is knowledge about COVID-19 which is a current and timely concern. Thus, there is a repeated exposure to COVID-19 related information since the coronavirus pandemic is being widely communicated in the world. As well, it has been talked via social and mass media to inform HCPs and the population at large. Moreover, our result is also much higher than the studies conducted in Nigeria and Iran where 56.5% and 56% of HCPs were knowledgeable about COVID-19 respectively [23,34]. This variation could be due to the difference in the study area, geographic coverage, and the nature of questions used to assess the knowledge variable.

Our study revealed that majority of HCPs (94.4%) had a positive attitude toward COVID-19. This finding was in line with the studies conducted in Pakistan and Vietnam where the majority of HCWs had a positive attitude towards COVID-19 [32,39]. Although the majority of participants reported high level of positive response for each items of attitude, only 29% of the HCPs in our study strongly agreed that COVID-19 transmission can be prevented through practicing widely recommended precaution measures. This result suggested that only a small number of respondents were very much confident of the recommended COVID-19 prevention measures. This might be due to the fact that almost half of HCPs were not attending COVID-19 related training and the training may be inadequate for those who trained on

**Table 6. Factors associated with COVID-19 prevention practice of participants among health care providers in Amhara region, Ethiopia, 2020.**

| Variables             | Categories      | Practice   |           | Crude Odds Ratio (COR) (95%CI) | Adjusted Odds Ratio (AOR) (95%CI) |
|-----------------------|-----------------|------------|-----------|--------------------------------|-----------------------------------|
|                       |                 | Good       | Poor      |                                |                                   |
| Sex                   | Male            | 208 (50.7) | 62 (15.1) | 0.32 (0.16–0.61)               | 0.72 (0.32–1.63)                  |
|                       | Female          | 128 (31.2) | 12 (3.0)  | 1                              | 1                                 |
| Age                   | >30             | 125 (30.5) | 21 (5.1)  | 0.67(0.39–1.16)                | 0.80 (0.44–1.46)                  |
|                       | <30             | 211 (51.5) | 53 (12.9) | 1                              | 1                                 |
| Occupation            | Nurses          | 152 (37.1) | 24 (5.9)  | 3.56(1.34–5.19)                | <b>2.13 (1.13–3.99)*</b>          |
|                       | Health officers | 2 (0.5)    | 50 (12.2) | 0.02(0.01–46.99)               | 0.17 (0.07–1.59)                  |
|                       | Pharmacist      | 54 (13.2)  | 10 (2.4)  | 3.04(0.96–5.28)                | 1.78(0.65–4.89)                   |
|                       | Others          | 48 (11.7)  | 20 (4.8)  | 1.35 (0.34–1.61)               | 0.55(0.19–1.61)                   |
|                       | Physician       | 32 (7.8)   | 18 (4.4)  | 1                              | 1                                 |
| Experience            | < 5 years       | 185 (45.1) | 54 (13.2) | 2.20(1.26–3.84)                | <b>0.46(0.24–0.86)*</b>           |
|                       | ≥ 5 years       | 151 (36.8) | 20 (4.9)  | 1                              | 1                                 |
| Source of information | Social media    | 128 (31.2) | 16 (3.9)  | 4.97(2.55–9.66)                | <b>6.20(2.33–16.51)*</b>          |
|                       | Radio & TV      | 150 (36.6) | 22 (5.4)  | 4.23(2.29–7.79)                | <b>4.03(1.56–10.38)*</b>          |
|                       | Others          | 58 (14.1)  | 36 (8.8)  | 1                              | 1                                 |
| Knowledge             | Adequate        | 305 (74.4) | 63 (15.4) | 1.72.(0.82–3.59)               | 0.76 (0.28–2.06)                  |
|                       | Poor            | 31 (7.6)   | 11 (2.6)  | 1                              | 1                                 |

<https://doi.org/10.1371/journal.pgph.0000171.t006>

COVID 19. Based on the result and information presented here, it was informative that training courses and trusts worthy attitudinal inspirations need to be placed given the seriousness of the disease.

Our study showed that about four-fifth of HCPs had good COVID-19 prevention practice. This result was comparable with a study conducted in Uganda where 74% of HCPs had a good practice towards COVID-19 [8]. This finding was higher than a study conducted in Ethiopia which reflected that 62% of HCWs had good preventive practice [27]. The possible explanation could be the difference in sample size, method of data collection and coverage of the study area. In contrast, this finding was lower than findings from Pakistan and China in which 88.7% and 89.7% of HWs had a good practice regarding COVID-19 respectively [32,38]. The presence of big differences in socio-economic and healthcare system might explain the variations of findings in these countries. Because these situations could greatly affect the availability of PPE, IP policies, access to and adequacy of trainings, information sources and awareness levels of HWs [30,31]. Majority of the HCPs in our study were regularly exercising the recommended infection prevention and control practices. These included covering eye and mouth with a tissue while sneezing/coughing, avoidance of touching eyes and mouth and wearing a face mask when in crowded situation and when in contact with patients. These were very essential practices to prevent the transmission of COVID-19 from HCPs to patients and among HCPs themselves. However, only 71% of HCPs admitted giving health education for clients about COVID-19 on regular basis. This might be attributed to the high work load of HCPs that would make them to be busy to provide valuable information on COVID-19.

In this study, the results for prevention practice were slightly lower than those for knowledge (79.5% vs 89.8%). Meaning, despite a higher proportion of adequate knowledge among HCPs in this study, the proportion of good prevention practice was slightly lower. This finding was in contrast with earlier studies which indicated that HWs with better knowledge would practice more preventive measures [36]. However, HWs better knowledge on IP strategies depend on their information sources, access to training and presence of IP guidelines among others [8,36,37]. In general, having sufficient knowledge may reflect the wider dissemination

of information about COVID-19 through different media. Nevertheless, about 77% of HCPs in our study seemed to use social and news media as the main sources of information about COVID-19. This finding was however a significant concern given the credibility and reliability of the information obtained from these sources. Although information from these sources has had a positive impact on the knowledge of HCPs, HCPs might not practice all what they know considering that misinformation and disinformation may mislead to wrong practice. This finding was in contrast with studies conducted in Iran and Vietnam where the website of WHO and ministry of health were used as the main sources of information about COVID-19 [39,40]. This suggested that HCPs are more likely to have good prevention practice if they are encouraged to use official websites as an essential and credible source of information.

Some of the significant factors associated with COVID-19 prevention practice were profession of HCPs, working experience and sources of COVID-19 related information. The current study affirmed that HCPs who were Nurses in their profession were five times more likely to have good COVID-19 prevention practice as compared to Physicians. This finding was supported by a prior study conducted globally, but in contrast with a study conducted in Uganda [8,31]. This might be due to the chance of better refresher trainings, personal commitment and follow-up. Working experience was one of the factors that were significantly associated with COVID-19 prevention practice among HCPs in this study. HCPs with less than five years of working experience were more likely to have good prevention practice as compared to their counterparts. Those with less than five years of working experience might receive repeated training about COVID-19 and its prevention and they might be as effective in watching the right ways of pandemic prevention mechanisms demonstrated via trusted sources or websites. HCPs that had less than five years of work experience were 46% times more likely to have good prevention practice than HCPs who had five and above years of working experience. This is linked to the ongoing training provided for HCPs with limited years of experience. This was in contrast with earlier studies [21,26].

Our study showed that source of information has a significant association with HCP's COVID-19 prevention practice. The likelihood of good COVID-19 prevention practice was about four times more likely among HCPs who used Radio and TV as source of COVID-19 information as compared to those who used other sources. Similarly, other previous studies reported good COVID-19 prevention practice in HCPs who used news media like Radio and TV [36]. Similarly, participants who used social media as a source of information had about six times more chance of having good COVID-19 prevention practice as compared to those who used other sources. This finding was in line with studies conducted globally and in Vietnam [31,39].

## Limitations

The study had some limitations. Firstly, no standardized tool for assessing KAPs on COVID-19 has been validated previously. We have however adapted and modified a previously published tool used to assess KAP among HCPs [25,31]. The questions have been organized from WHO and CDC guidelines and reports on COVID-19 [34]. Especially, the questions used to measure the knowledge of HCPs about COVID19 (including the available treatment options and supportive cares) are not sufficient enough. Secondly, only HCPs in governmental health facilities were participated in the survey and the results of this study may not reflect the KAPs of HCPs in the whole region. Thirdly, data were collected using self-administered techniques so that the validity of data may be affected in some extent. Since it is a one-time study, it shared the limitations of a cross-sectional study to show cause-effect relationships between the independent and the outcome variables.

## Conclusions

This study concluded that HCPs had adequate knowledge, positive attitude and good prevention practice regarding the COVID-19 pandemic. Avoidance of touching eyes and mouth and wearing face masks regularly were the preventive measures that HCPs were most likely to comply with. Profession, working experience and sources of COVID-19 information had showed a positive significant association with COVID-19 prevention practices. Likewise, being a Nurse, having < 5 years of working experience, using social media and television and or radio as information sources were the factors significantly associated with good COVID-19 prevention practice. Thus, developing HCPs' professional carrier through training opportunities, sharing experiences and using verified information sources are crucial to better improve COVID-19 prevention practice. Also, building the skills of HCPs and updating their knowledge are required to reduce the risk of acquiring COVID-19 infection.

## Supporting information

**S1 Text. English version questionnaire.**

(DOCX)

**S2 Text. Amharic version questionnaire.**

(DOCX)

**S1 Data. SPSS dataset.**

(SAV)

## Acknowledgments

Authors would like to thank Debre Markos University for providing the necessary support and study ethical clearance. The authors' gratefulness also goes to all study participants and data collectors who participated in the study.

## Author Contributions

**Conceptualization:** Wassachew Ashebir.

**Data curation:** Wassachew Ashebir, Belete Yimer, Atsede Alle, Muluken Teshome, Yohannes Teka, Awraris Wolde.

**Formal analysis:** Wassachew Ashebir, Belete Yimer, Atsede Alle, Muluken Teshome, Yohannes Teka, Awraris Wolde.

**Investigation:** Wassachew Ashebir, Belete Yimer, Atsede Alle, Muluken Teshome, Yohannes Teka, Awraris Wolde.

**Methodology:** Wassachew Ashebir, Belete Yimer, Atsede Alle, Muluken Teshome, Yohannes Teka, Awraris Wolde.

**Supervision:** Wassachew Ashebir, Belete Yimer, Atsede Alle, Muluken Teshome, Yohannes Teka, Awraris Wolde.

**Validation:** Wassachew Ashebir, Belete Yimer, Atsede Alle, Muluken Teshome, Yohannes Teka, Awraris Wolde.

**Writing – original draft:** Wassachew Ashebir.

**Writing – review & editing:** Wassachew Ashebir, Belete Yimer, Atsede Alle, Muluken Teshome, Yohannes Teka, Awraris Wolde.

## References

1. WHO. Novel Coronavirus (2019-nCoV) situation reports-22 <https://www.who.int/docs/default-source/coronaviruses/situation-reports/20200211-sitrep-22-ncov.pdf?2020> [11 February 2020].
2. Zhu N, Zhang D, Wang W, Li X, Yang B, Song J, et al. A Novel Coronavirus from Patients with Pneumonia in China, 2019. *N Engl J Med.* 2020; 382(8):727–733. <https://doi.org/10.1056/NEJMoa2001017> PMID: 31978945.
3. Li Q, Guan X, Wu P, Wang X, Zhou L, Tong Y, et al. Early transmission dynamics in Wuhan, China, of novel coronavirus-infected pneumonia. *Engl J Med.* 2020; 182:1199–207. <https://doi.org/10.1056/NEJMoa2001316> PMID: 31995857
4. Euro surveillance EETJ: Note from the editors: World Health Organization declares novel coronavirus (2019-nCoV) sixth public health emergency of international concern. 2020, 25(5):200131e.
5. World Health Organization. Novel coronavirus (COVID-19) situation. Available from: <https://experience.arcgis.com/experience/685d0ace521648f8a5beeeee1b9125cd> (Accessed on 30 April 2020).
6. Liu Q, Luo D, Haase J, Guo Q, Wang X, Liu S, et al. The experiences of health-care providers during the COVID-19 crisis in China: a qualitative study *Lancet Global Health*; 2020. [https://doi.org/10.1016/S2214-109X\(20\)30204-7](https://doi.org/10.1016/S2214-109X(20)30204-7) PMID: 32573443
7. Ossenl IA. COVID-19 pandemic in sub-Saharan Africa: preparedness, response, and hidden potentials. *Trop Med Health.* 2020; 48(1):1–3.
8. Olum R, Chekwech G, Wekha G, Nassozi DR, Bongomin F. Coronavirus Disease-2019: knowledge, attitude, and practices of health care workers at Makerere University Teaching Hospitals, Uganda. *Front Public Health.* 2020; 8:181. <https://doi.org/10.3389/fpubh.2020.00181> PMID: 32426320.
9. Ayinde O, Usman AB, Aduroja P, Gbolahan A. A cross-sectional study on Oyo state health care workers knowledge, Perception and practice regarding corona virus disease 2019 (COVID-19); 2020.
10. WHO 2020d: Coronavirus disease 2019 (COVID-19): situation report, 82. 2020.
11. Wang J, Zhou M, Liu F. Reasons for healthcare workers becoming infected with novel coronavirus disease 2019 (COVID-19) in China. *J Hosp Infect.* 2020; 6:1051. <https://doi.org/10.1016/j.jhin.2020.03.002> PMID: 32147406
12. World Health Organization. 2003. Fact sheet.
13. ICN calls for data on healthcare worker infection rates and deaths [[www.icn.ch/news/icn-calls-data-healthcare-worker-infection-rates-anddeaths](http://www.icn.ch/news/icn-calls-data-healthcare-worker-infection-rates-anddeaths)]. Accessed 26 May 2020.
14. Wu Z and McGoogan JM. Characteristics of and important lessons from the coronavirus disease 2019 (COVID-19) outbreak in China: summary of a report of 72314 cases from the Chinese Center for Disease Control and Prevention. *JAMA.* 2020; 323(13):1239–42. <https://doi.org/10.1001/jama.2020.2648> PMID: 32091533.
15. McEachan R, Taylor N, Harrison R, Lawton R, Gardner P, Conner M. Meta-analysis of the reasoned action approach (RAA) to understanding health behaviors. *Ann Behav Med.* 2016; 50(4): 592–612. <https://doi.org/10.1007/s12160-016-9798-4> PMID: 27169555.
16. Taysir A, Ng S, Gamil A, Mai L, Prakash S, Lam N, et al. Knowledge and preparedness of hospital staff against novel coronavirus: a global survey. Published protocol 2020. <https://doi.org/10.2139/ssrn.3550294>.
17. Clements JM. Knowledge and behaviors toward COVID-19 among US residents during the early days of the pandemic. *medRxiv.* (2020). <https://doi.org/10.2196/19161> PMID: 32369759
18. WHO (2020e). Coronavirus disease (COVID-19) outbreak: rights, roles and responsibilities of health workers, including key considerations for occupational safety and health. 2020: [https://www.who.int/docs/defaultsource/coronaviruses/who-rights-roles-response-h COVID-19.pdf?sfvrsn=bcabd401\\_400](https://www.who.int/docs/defaultsource/coronaviruses/who-rights-roles-response-h COVID-19.pdf?sfvrsn=bcabd401_400).
19. WHO (2020f). Infection prevention and control during health care when novel coronavirus (nCoV) infection is suspected: interim guidance, 25 January 2020.
20. Xu K, Lai X, Zheng L. Suggestions on the prevention of COVID-19 for health care workers in department of otorhinolaryngology head and neck surgery. *World Journal of Otorhinolaryngology-Head And Neck Surgery.* 2020; 2. <https://doi.org/10.1016/j.wjorl.2020.03.002> PMID: 32292630
21. Papagiannis D, Malli F, Raptis DG, et al. Assessment of knowledge, attitudes, and practices towards new coronavirus (SARS-CoV-2) of health care professionals in Greece before the outbreak period. *Int J Environ Res Public Health.* 2020; 17:4925. <https://doi.org/10.3390/ijerph17144925> PMID: 32650614
22. Jemal S, Zeleke M, Tezera S, Hailu S, Abdosh A, Biya M, et al. Health care workers' knowledge, Perception and practice towards infection prevention in Dubti referral hospital, Dubti, north East Ethiopia. *Int J Infect Dis Therapy.* 2019; 3(4):66.

23. Ogolodom MP, Mbaba AN, Alazigha N, Erondu OF, Egbe NO, Christian ME, et al. Knowledge, attitudes and fears of healthcare workers towards the Corona Virus Disease (COVID-19) pandemic in South-South, Nigeria. *Health Sci J.* 2020; Sp. Iss 1:002. <https://doi.org/10.36648/1791-809X.S1.002>.
24. Cooper S, Wiyeh A, Schmidt BM, Wiysonge CS. Cochrane corner: factors that influence compliance by healthcare workers with infection prevention and control guidelines for COVID-19 and other respiratory infections. *Pan African Med J.* 2020; 6: 35(23). <https://doi.org/10.11604/pamj.supp.2020.35.2.23012> PMID: [33623548](https://pubmed.ncbi.nlm.nih.gov/33623548/)
25. Zenbaba D, Sahiledengle B, Bogale D. Practices of healthcare workers regarding infection prevention in bale zone hospitals. *Southeast Ethiopia Advances in Public Health.* 2020; 1:2020.
26. Sahiledengle B, Gebresilassie A, Getahun T, Hiko DJ. Infection prevention practices and associated factors among healthcare workers in governmental healthcare facilities in Addis Ababa. *Ethiop J Health Sci.* 2018; 28(2):177–86. <https://doi.org/10.4314/ejhs.v28i2.9> PMID: [29983515](https://pubmed.ncbi.nlm.nih.gov/29983515/)
27. Asemahagnet.,al (2020). Factors determining the knowledge and prevention practice of healthcare workers towards COVID-19 in Amhara region, Ethiopia: a cross-sectional survey. <https://doi.org/10.1186/s41182-020-00254-3>.
28. Zhong BL, Luo W, Li HM, et al. Knowledge, attitudes, and practices towards COVID-19 among Chinese residents during the rapid rise period of the COVID-19 outbreak: a quick online cross-sectional survey. *Int J Biol Sci.* 2020; 16(10):1745–1752. <https://doi.org/10.7150/ijbs.45221> PMID: [32226294](https://pubmed.ncbi.nlm.nih.gov/32226294/).
29. World Health Organization. Coronavirus disease 2019 (COVID-19) advice for the public: Myth busters. 2020.
30. Ferdous M.Z, Islam M.S, Sikder M.T, Mosaddek ASM., Zegarra-Valdivia JA, Gozal D (2020) Knowledge, attitude, and practice regarding COVID-19 outbreak in Bangladesh: An online based cross-sectional study. *PLoS ONE* 15(10): e0239254. <https://doi.org/10.1371/journal.pone.0239254> PMID: [33035219](https://pubmed.ncbi.nlm.nih.gov/33035219/)
31. Bhagavathula AS, Aldhaleei WA, Rahmani J, Mahabadi MA, Bandari DK. Novel coronavirus (COVID-19) knowledge and perceptions: a survey of healthcare workers. *JMIR Public Health Surveill.* 2020; 6(2):e19160. <https://doi.org/10.2196/19160> PMID: [32320381](https://pubmed.ncbi.nlm.nih.gov/32320381/).
32. Saqlain M, Munir MM, Rehman SU, Gulzar A, Naz S, Ahmed Z, et al. Knowledge, attitude, practice and perceived barriers among healthcare workers regarding COVID-19: a cross-sectional survey from Pakistan. *J Hosp Infect.* 2020; 105(3):419–23. <https://doi.org/10.1016/j.jhin.2020.05.007> PMID: [32437822](https://pubmed.ncbi.nlm.nih.gov/32437822/).
33. Desalegn Z, Deyessa N, Tekla B, Shiferaw W, Yohannes M, Hailemariam D, et al. (2021) Evaluation of COVID-19 related knowledge and preparedness in health professionals at selected health facilities in a resource-limited setting in Addis Ababa, Ethiopia. *PLoS ONE* 16(2): e0244050. <https://doi.org/10.1371/journal.pone.0244050> PMID: [33566814](https://pubmed.ncbi.nlm.nih.gov/33566814/)
34. Taghrir MH, Borazjani R, Shiraly R. COVID-19 and Iranian medical students; a survey on their related-knowledge, prevention Behaviors and risk perception. *Arch Iran Med.* 2020; 23(4):249–54. <https://doi.org/10.34172/aim.2020.06> PMID: [32271598](https://pubmed.ncbi.nlm.nih.gov/32271598/)
35. Roy D, Tripathy S, Kar SK, Sharma N, Verma SK, Kaushal V. Study of knowledge, attitude, anxiety & perceived mental healthcare need in Indian population during COVID-19 pandemic. *Asian J Psychiatr.* 2020; 51:102083. <https://doi.org/10.1016/j.ajp.2020.102083> PMID: [32283510](https://pubmed.ncbi.nlm.nih.gov/32283510/)
36. Kaliyaperumal K. Guideline for conducting a knowledge, attitude and practice (KAP) study. *A ECS illumination.* (2004) 4:7–9. Available online at: [http://v2020eresource.org/content/files/guideline\\_kap\\_Jan\\_mar04.pdf](http://v2020eresource.org/content/files/guideline_kap_Jan_mar04.pdf).
37. Goni MD, Naing NN, Hasan H, Wan-Arfah nN, Deris ZZ, Arifin WN, et al. Development and validation of KAP questionnaire for prevention of respiratory tract infections among Malaysian Hajj Pilgrims. *BMC Public Health.* (2020) 20:189. <https://doi.org/10.1186/s12889-020-8269-9> PMID: [32114986](https://pubmed.ncbi.nlm.nih.gov/32114986/)
38. Zhou M, Tang F, Wang Y, Nie H, Zhang L, You G, et al. Knowledge, attitude and practice regarding COVID-19 among health care workers in Henan, China. *J Hosp Infect.* 2020; 105(2):183–7. <https://doi.org/10.1016/j.jhin.2020.04.012> PMID: [32278701](https://pubmed.ncbi.nlm.nih.gov/32278701/).
39. Giao H, Nguyen TNH, Tran VK, Ngan Vo K, Ngan VK, Tam V, et al. Knowledge and attitude toward COVID-19 among healthcare workers at District 2 Hospital, Ho Chi Minh City. *Asian Pacific Journal of Tropical Medicine.* 2020. <https://doi.org/10.4103/1995-7645.280396>.
40. Nemati M, Ebrahimi B, Nemati F. Assessment of Iranian nurses' knowledge and anxiety toward COVID-19 during the current outbreak in Iran. *Arch Clin Infect Dis.* 2020; 15(COVID-19); e102848. <https://doi.org/10.5812/archid.102848>.
